# Supplementary material for: Utilization of conformation change and charge trapping to achieve binary/ternary rewritable memory performance of carbazole-based organic molecules
Source: Royal Society of Chemistry journal article supplement (doi:10.1039/d1nj04557a), 2021-01-01
Supplement: d1nj04557a1.pdf [file d1nj04557a1.pdf]

## Supplementary information

### Through conformation change and charge trapping to achieve binary/ternary rewritable memory performance of carbazole-based organic molecules

Yanhua Yang<sup>ab1,\*</sup>, Jinwen Ma<sup>a1</sup>, Xiujuan He<sup>a</sup>, Gaozhang Gou<sup>c,\*\*</sup>, Huiwu Mao<sup>d</sup>, Juqing Liu<sup>d</sup>

<sup>a</sup> School of Chemistry and Chemical Engineering, Kunming University, Kunming, 650214, P. R. China.

<sup>b</sup> Yunnan Engineering Technology Research Center for Plastic Films, Kunming University, Kunming, 650214, P. R. China.

<sup>c</sup> Key Laboratory of Natural Pharmaceutical & Chemical Biology of Yunnan Province, School of Chemistry and Resources Engineering, Honghe University, Mengzi, 661100, P. R. China.

<sup>d</sup> Institute of Advanced Materials (IAM), Nanjing Tech University, Nanjing, 210009, P. R. China.

#### Content

|                                                                                                                                                     |   |
|-----------------------------------------------------------------------------------------------------------------------------------------------------|---|
| <b>Fig. S1</b> <sup>1</sup> H NMR spectrum of <b>Cz-2Br</b> in DMSO- <i>d</i> <sub>6</sub> .....                                                    | 2 |
| <b>Fig. S2</b> <sup>1</sup> H NMR and <sup>13</sup> C NMR spectra of <b>Cz-2Br-NO<sub>2</sub></b> in DMSO- <i>d</i> <sub>6</sub> .....              | 2 |
| <b>Fig. S3</b> <sup>1</sup> H NMR and <sup>13</sup> C NMR spectra of <b>Cz-2Br-NH<sub>2</sub></b> in DMSO- <i>d</i> <sub>6</sub> .....              | 3 |
| <b>Fig. S4</b> <sup>1</sup> H NMR and <sup>13</sup> C NMR spectra of <b>Cz-2Ph3F</b> in DMSO- <i>d</i> <sub>6</sub> .....                           | 3 |
| <b>Fig. S5</b> <sup>1</sup> H NMR and <sup>13</sup> C NMR spectra of <b>Cz-2TPA</b> in DMSO- <i>d</i> <sub>6</sub> .....                            | 4 |
| <b>Fig. S6</b> <sup>1</sup> H NMR (DMSO- <i>d</i> <sub>6</sub> ) and <sup>13</sup> C NMR (CDCl <sub>3</sub> ) spectra of <b>Cz-2Ph3F 6FDA</b> ..... | 4 |
| <b>Fig. S7</b> <sup>1</sup> H NMR and <sup>13</sup> C NMR spectra of <b>Cz-2TPA 6FDA</b> in DMSO- <i>d</i> <sub>6</sub> .....                       | 5 |
| <b>Fig. S8</b> <sup>1</sup> H NMR spectra and FT-IR spectra.....                                                                                    | 5 |
| <b>Fig. S9</b> Effect of the operation time on the current of the devices.....                                                                      | 6 |
| <b>Fig. S10</b> Linear fitting models and corresponding the OFF state curves of ITO/ <b>Cz-2Ph3F 6FDA</b> /Al during positive scan.....             | 6 |
| <b>Fig. S11</b> Linear fitting models and corresponding the ON1 state curves of ITO/ <b>Cz-2TPA 6FDA</b> /Al during positive scan.....              | 7 |
| <b>Fig. S12</b> The normalized fluorescence emission spectra.....                                                                                   | 7 |

\* Correspond author, E-mail address: yh\_yangkmu@126.com (Y. Yang)  
hhxylxyhxx@126.com (G. Gou)

<sup>1</sup> The authors contribute equally to this paper.

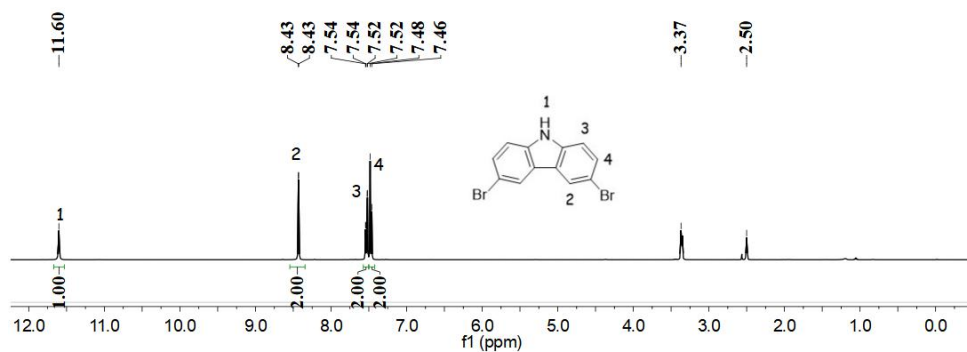

Fig. S1  $^1\text{H}$  NMR spectrum of Cz-2Br in DMSO- $d_6$ .

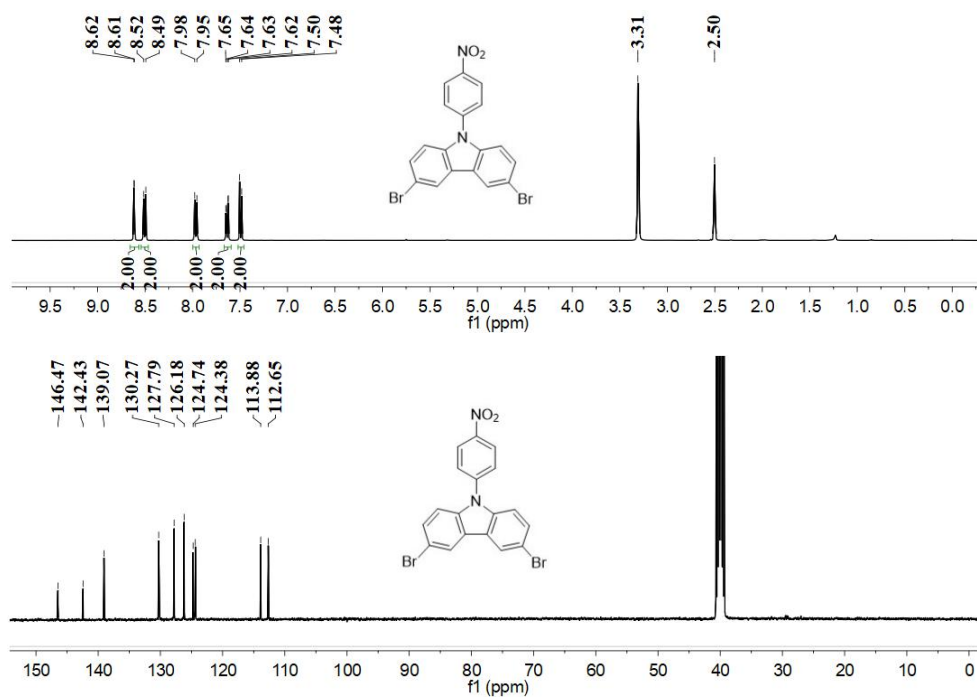

Fig. S2  $^1\text{H}$  NMR and  $^{13}\text{C}$  NMR spectra of Cz-2Br-NO<sub>2</sub> in DMSO- $d_6$ .

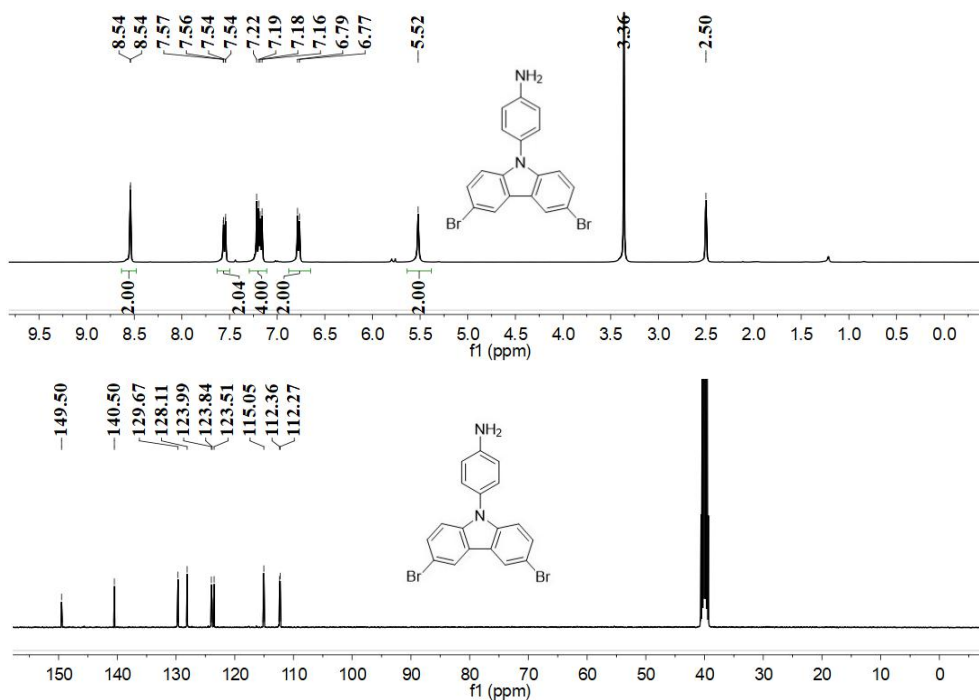

Fig. S3 <sup>1</sup>H NMR and <sup>13</sup>C NMR spectra of Cz-2Br-NH<sub>2</sub> in DMSO-d<sub>6</sub>.

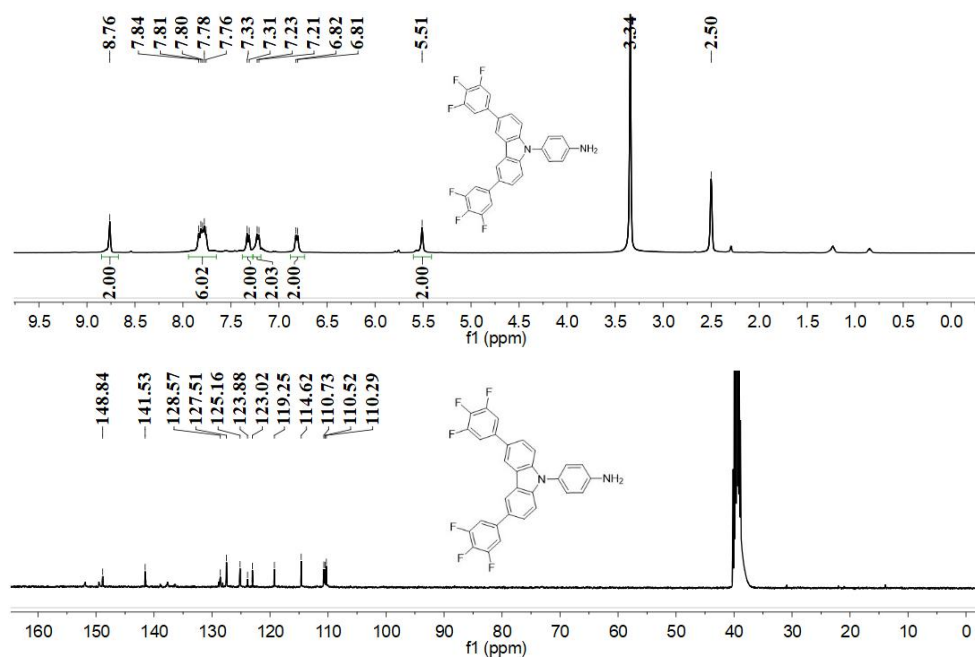

Fig. S4 <sup>1</sup>H NMR and <sup>13</sup>C NMR spectra of Cz-2Ph<sub>3</sub>F in DMSO-d<sub>6</sub>.

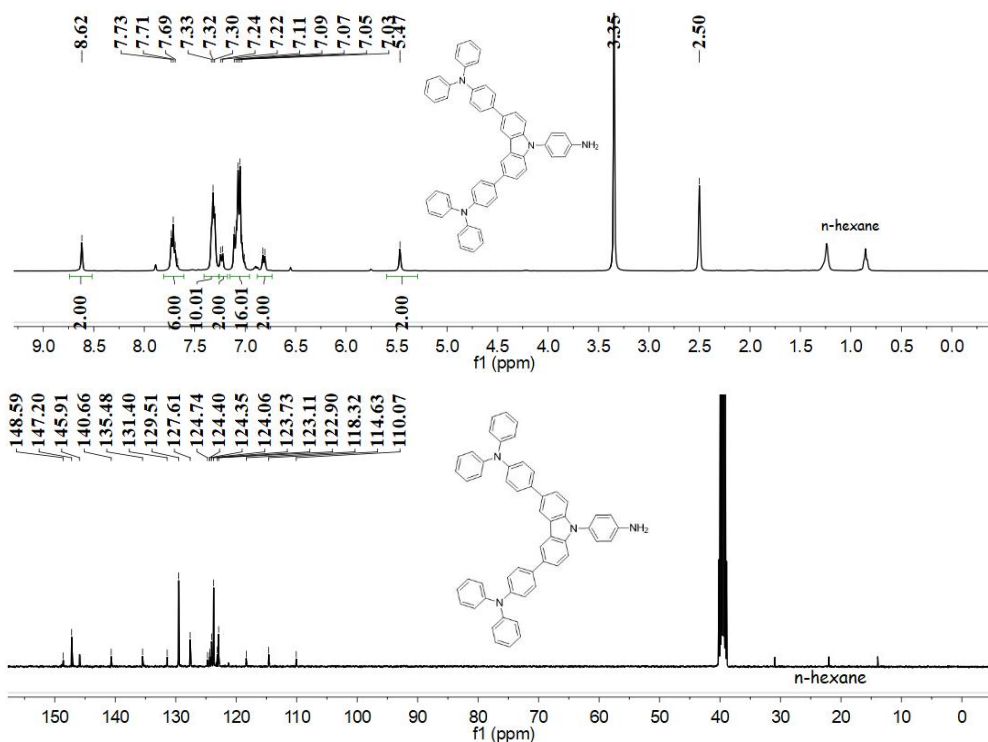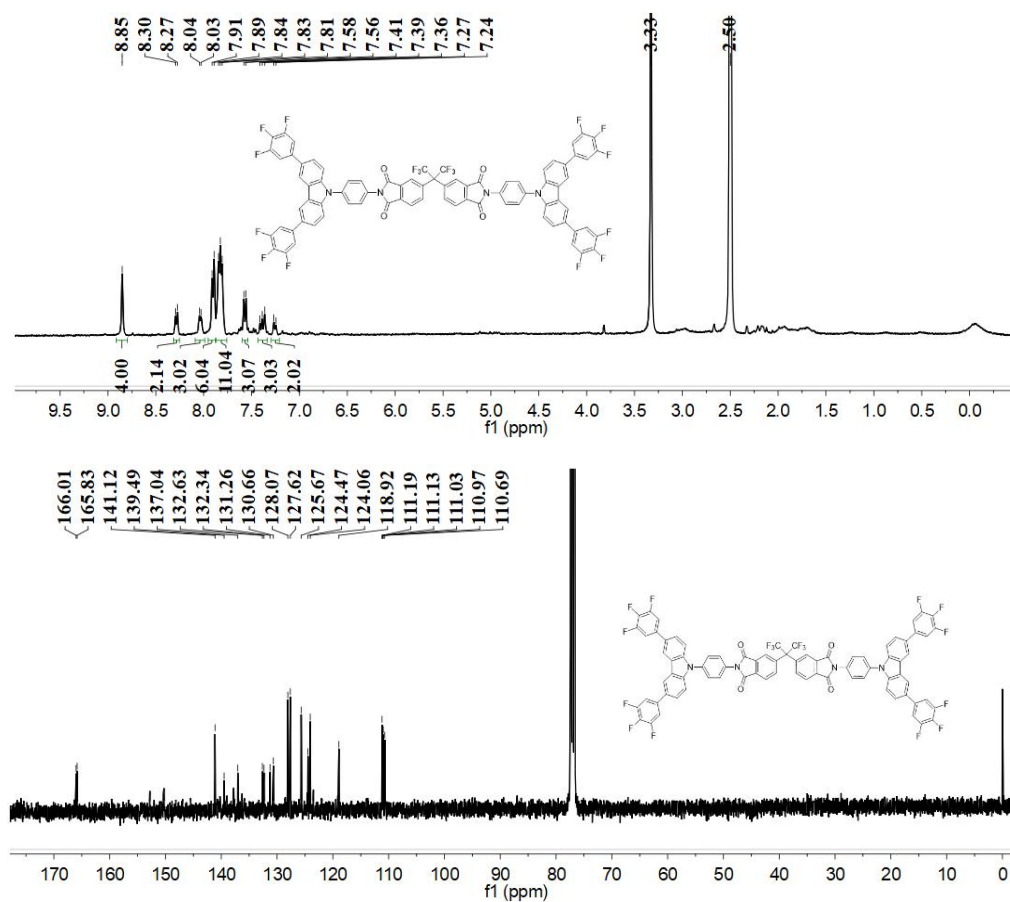

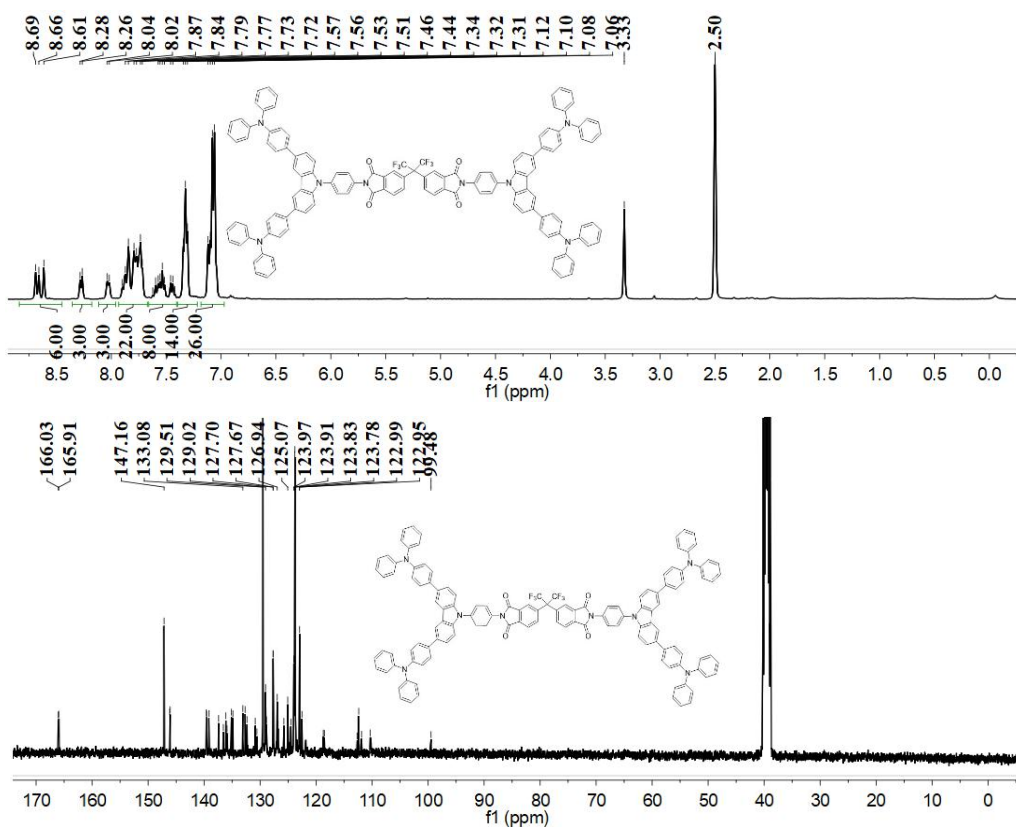

Fig. S7  $^1\text{H}$  NMR and  $^{13}\text{C}$  NMR spectra of Cz-2TPA 6FDA in DMSO- $d_6$ .

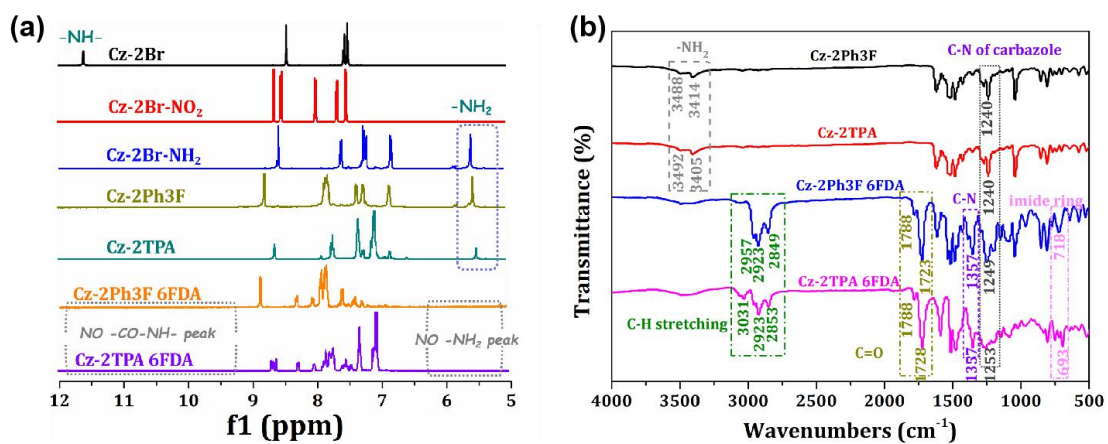

Fig. S8 (a)  $^1\text{H}$  NMR spectra of organic compounds in DMSO- $d_6$ . (b) FT-IR spectra.

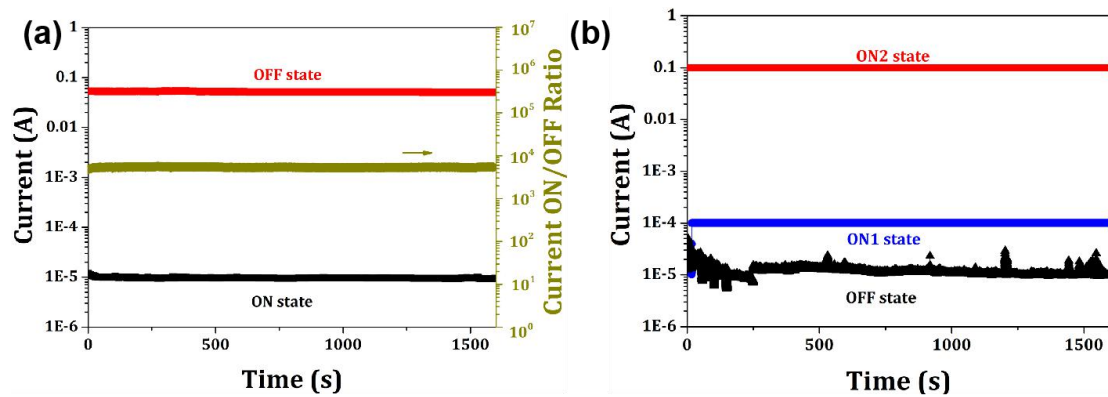

**Fig. S9** (a) Effect of the operation time on the current of the ITO/Cz-2Ph3F 6FDA/Al device on the ON and OFF states tested at 1 V under ambient condition. (b) Effect of the operation time on the current of the ITO/Cz-2TPA 6FDA/Al device on the ON2, ON1, and OFF states tested at 1 V under ambient condition.

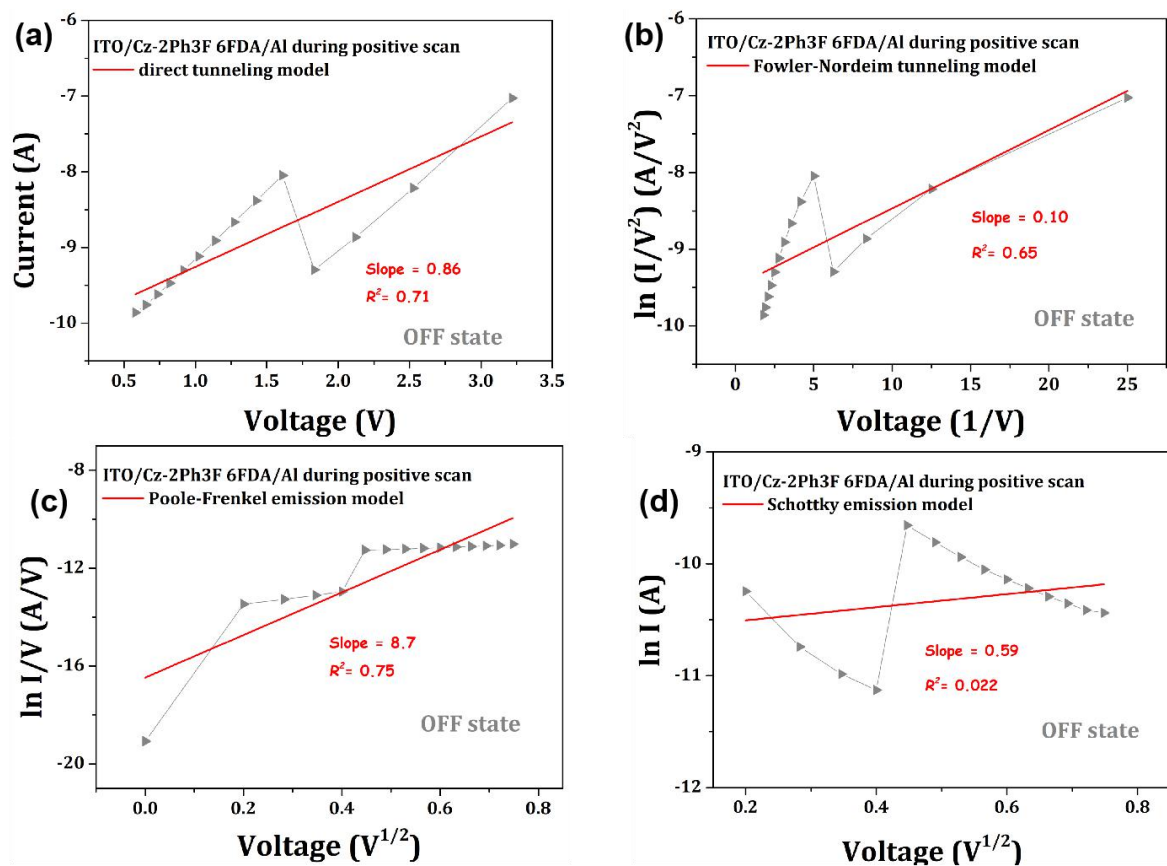

**Fig. S10** Linear fitting models and corresponding the OFF state curves of ITO/Cz-2Ph3F 6FDA/Al

during positive scan.

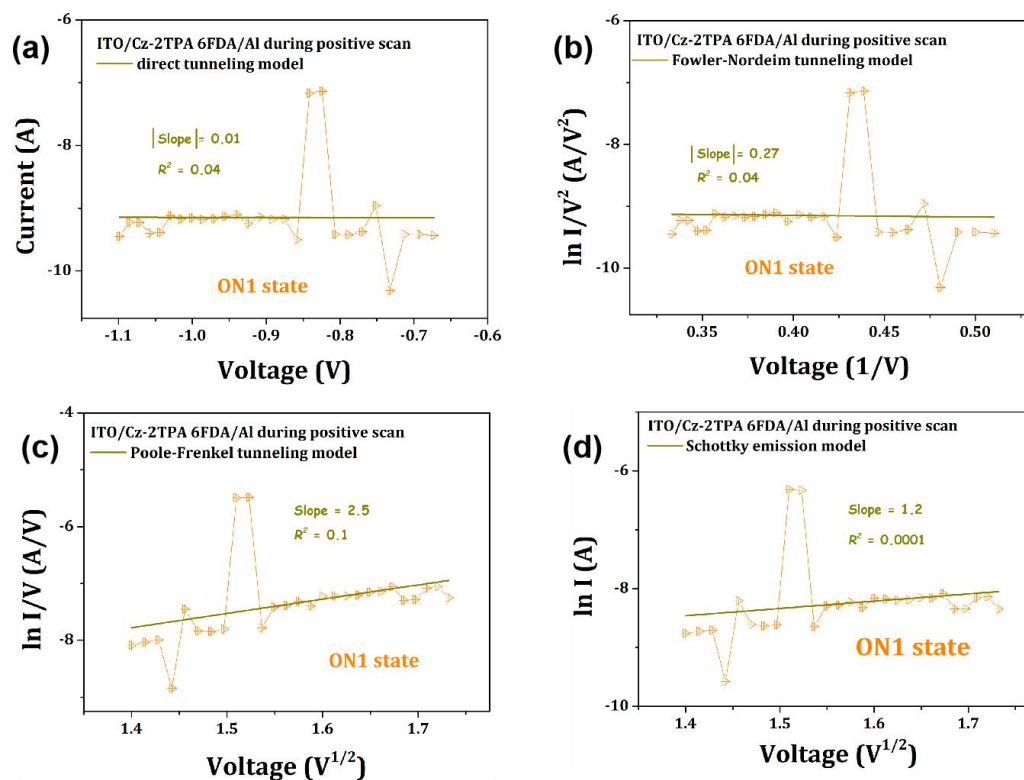

**Fig. S11** Linear fitting models and corresponding the ON1 state curves of ITO/Cz-2TPA 6FDA/Al during positive scan.

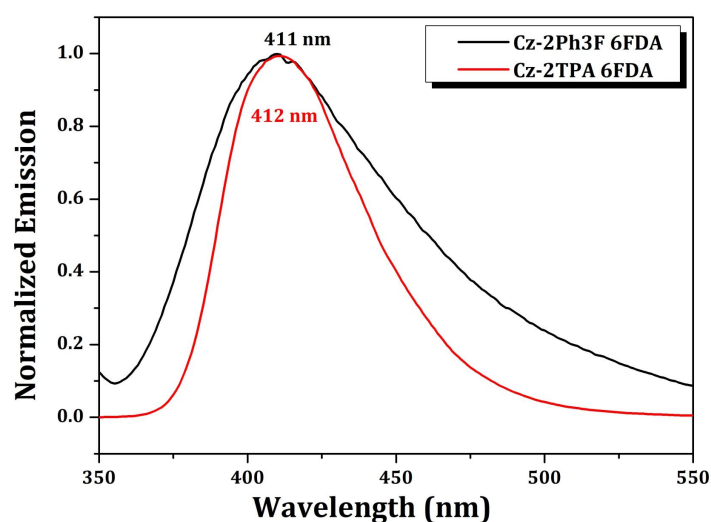

**Fig. S12** The normalized fluorescence emission spectra of Cz-2Ph3F 6FDA and Cz-2TPA 6FDA in CH<sub>2</sub>Cl<sub>2</sub>.
